# Supplementary material for: Transient cellular adhesion on poly(ethylene-glycol)-dimethacrylate hydrogels facilitates a novel stem cell bandage approach
Source: PLoS One. 2018 Aug 23;13(8):e0202825. doi: 10.1371/journal.pone.0202825 (PMC6107244; doi:10.1371/journal.pone.0202825)
Supplement: S7 Fig — (XLSX) [file pone.0202825.s007.xlsx]

## Sheet: data
WEAK DELIVERY EXPERIMENT										Data without outliers
Day 7	Gel 1	Gel 2	Gel 3	Gel 4	Gel 5	Average	S.D.		Day 7	Gel 1	Gel 2	Gel 3	Gel 4	Gel 5	Average	S.D.
RGD/Plain Total	53600	60900	51500	60600	41400	53600	7992.81		RGD/Plain Total	53600	60900	51500	60600	41400	53600	7992.81
RGD/RGD Total	36400	42200	36400	47800	48600	42280	5906.95		RGD/RGD Total	36400	42200	36400	47800	48600	42280	5906.95
Day 14	Gel 1	Gel 2	Gel 3	Gel 4	Gel 5	Average	S.D.		Day 14	Gel 1	Gel 2	Gel 3	Gel 4	Gel 5	Average	S.D.
RGD/Plain Total	203000	151000	138000	129000	199000	164000	34698.7		RGD/Plain Total	203000	151000	138000	129000	199000	164000	34698.7
RGD/RGD Total	123000	163000	107000	74200	72900	108020	37501.5		RGD/RGD Total	123000		107000	74200	72900	94275	24812.3
											Data in graph format
Q test			Qc Values						Day 7	Gel 1	Gel 2	Gel 3	Gel 4	Gel 5	Average	S.D.		Stats
Day 7 RGD/Plain	Cells/mL	abs(x-xnear)	x-xnear/range	Range					RGD/Plain Total	53.6	60.9	51.5	60.6	41.4	53.6	7.99281		Day	Type	Cells
1	53600	2100	0.109375	19200	1				RGD/RGD Total	36.4	42.2	36.4	47.8	48.6	42.28	5.90695		d7	plain	53600
2	60900	300	0.015625		1													d7	plain	60900
3	51500	2100	0.109375		1				Day 14	Gel 1	Gel 2	Gel 3	Gel 4	Gel 5	Average	S.D.		d7	plain	51500
4	60600	300	0.015625		1				RGD/Plain Total	203	151	138	129	199	164	34.6987		d7	plain	60600
5	41400	10100	0.526042		1				RGD/RGD Total	123		107	74.2	72.9	94.275	24.8123		d7	plain	41400
																		d7	RGD	36400
Day 7 RGD/RGD	Cells/mL	abs(x-near)	x-xnear/range	Range					-RGD	++RGD								d7	RGD	42200
1	36400	0	0	12200	2													d7	RGD	36400
2	42200	5600	0.459016		2													d7	RGD	47800
3	36400	5800	0.47541		2													d7	RGD	48600
4	47800	5600	0.459016		2													d14	plain	203000
5	48600	800	0.0655738		2													d14	plain	151000
																		d14	plain	138000
Day 14 RGD/Plain	Cells/mL	abs(x-near)	x-xnear/range	Range														d14	plain	129000
1	203000	4000	0.0540541	74000	3													d14	plain	199000
2	151000	13000	0.175676		3													d14	RGD	123000
3	138000	9000	0.121622		3													d14	RGD
4	129000	9000	0.121622		3													d14	RGD	107000
5	199000	4000	0.0540541		3													d14	RGD	74200
																		d14	RGD	72900
Day 14 RGD/RGD	Cells/mL	abs(x-xnear)	x-xnear/range	Range
1	123000	16000	0.319361	50100		4
2	163000	40000	0.798403		outlier	4
3	107000	16000	0.319361			4
4	74200	1300	0.0259481			4
5	72900	1300	0.0259481			4

## Sheet: stats
	d7 plain	d7 RGD	d14 plain	d14 RGD
d7 plain
d7 RGD
d14 plain	x	x
d14 RGD	0.0588	x	x
