# Supplementary material for: Transient cellular adhesion on poly(ethylene-glycol)-dimethacrylate hydrogels facilitates a novel stem cell bandage approach
Source: PLoS One. 2018 Aug 23;13(8):e0202825. doi: 10.1371/journal.pone.0202825 (PMC6107244; doi:10.1371/journal.pone.0202825)
Supplement: S8 Fig — (XLSX) [file pone.0202825.s008.xlsx]

## Sheet: Raw Data
Cell Release Experiment 2.0
Day 1						Data Analysis												Scatter plot graphs
AEB			EMH				Day 1			Day 11								Cells/ml
RGD gel #	count cells/mL		Plain gel #	count cells/mL			RGD	Plain		RGD	Plain		RGD	Plain			1	269000		1 = d1 RGD
1	269000		1	173000		Avg	233333	457033		521000	872500		869333	583733			1	0
2	0		2	2110000		SD	277661	811246		262239	477126		459932	413328			1	0
3	0		3	143000													1	142000
4	142000		4	52800													1	750000
5	750000		5	176000													1	239000
6	239000		6	87400													5	173000		5 = d1 plain
																	5	2110000
Day 11																	5	143000
AEB			AEB														5	52800
RGD gel #	count cells/mL		Plain gel #	count cells/mL													5	176000
1	856000		1	198000													5	87400
2	530000		2	1680000													2	856000		2= d11 RGD
3	252000		3	875000													2	530000
4	284000		4	952000													2	252000
5	390000		5	795000													2	284000
6	814000		6	735000													2	390000
																	2	814000
																	3	458000		3=d14 RGD
		Day 14															3	1210000
AEB			AEB														3	560000
RGD gel #	count cells/mL		Plain gel #	count cells/mL													3	1410000
1	458000		1	621000													3	1220000
2	1210000		2	1310000													3	358000
3	560000		3	616000													6	198000		6=d11 plain
4	1410000		4	76400													6	1680000
5	1220000		5	327000													6	875000
6	358000		6	552000													6	952000
																	6	795000
																	6	735000
	Cell are in 1 ml of media																7	621000		7 = d14 plain
																	7	1310000
																	7	616000
																	7	76400
																	7	327000
																	7	552000

## Sheet: Data Analysis
Cell Release Experiment 2.0
Day 1						Data Analysis
AEB			EMH				Day 1			Day 11			Day 14					RGD?	Day	Cells/ml
RGD gel #	count cells/mL		Plain gel #	count cells/mL			RGD-	RGD++		Plain	RGD		Plain	RGD			1	y	d1	269000		1 = d1 RGD			Significance
1	269000		1	173000		Avg	126440	350000		839250	521000		438480	869333			1	y	d1					1v3	RGD d1 vs RGD d14
2			2			SD	54417.9	272119		94545.8	262239		235183	459932			1	y	d1					1v5	RGD d1 vs. Plain d11
3			3	143000													1	y	d1	142000				3v4	RGD d14 vs. Plain d1
4	142000		4	52800			Day 1			Day 11			Day 14				1	y	d1	750000				4v5	Plain d1 vs. Plain d11
5	750000		5	176000			-RGD	++RGD		Plain	RGD		Plain	RGD			1	y	d1	239000
6	239000		6	87400		Avg	0.12644	0.35		0.83925	0.521		0.43848	0.869333			5	y	d11	856000		5 = d1 plain
						SD	0.0544179	0.272119		0.0945458	0.262239		0.235183	0.459932			5	y	d11	530000
Day 11																	5	y	d11	252000
AEB			AEB														5	y	d11	284000
RGD gel #	count cells/mL		Plain gel #	count cells/mL													5	y	d11	390000
1	856000		1														5	y	d11	814000
2	530000		2														2	y	d14	458000		2= d11 RGD
3	252000		3	875000													2	y	d14	1210000
4	284000		4	952000													2	y	d14	560000
5	390000		5	795000													2	y	d14	1410000
6	814000		6	735000													2	y	d14	1220000
																	2	n	d14	358000
																	3	n	d1	173000		3=d14 RGD
		Day 14															3	n	d1
AEB			AEB														3	n	d1	143000
RGD gel #	count cells/mL		Plain gel #	count cells/mL													3	n	d1	52800
1	458000		1	621000													3	n	d1	176000
2	1210000		2														3	n	d1	87400
3	560000		3	616000													6	n	d11			6=d11 plain
4	1410000		4	76400													6	n	d11
5	1220000		5	327000													6	n	d11	875000
6	358000		6	552000													6	n	d11	952000
																	6	n	d11	795000
																	6	n	d11	735000
																	7	n	d14	621000		7 = d14 plain
																	7	n	d14
																	7	n	d14	616000
																	7	n	d14	76400
																	7	n	d14	327000
																	7	n	d14	552000
Q-test
RGD d1	Cells/ml	abs(X-Xnear)	X-Xnear/range	Range			RGD d11	Cells/ml	abs(X-Xnear)	X-Xnear/range	Range			RGD d14	Cells/ml	abs(X-Xnear)	X-Xnear/range	Range
1	269000	30000	0.0493421	608000			1	856000	42000	0.0695364	604000			1	458000	100000	0.095057	1052000
2							2	530000	140000	0.231788				2	1210000	10000	0.0095057
3							3	252000	32000	0.0529801				3	560000	102000	0.0969582
4	142000	97000	0.159539				4	284000	32000	0.0529801				4	1410000	190000	0.180608
5	750000	481000	0.791118				5	390000	106000	0.175497				5	1220000	10000	0.0095057
6	239000	30000	0.0493421				6	814000	42000	0.0695364				6	358000	100000	0.095057
Plain d1	Cells/ml	abs(X-Xnear)	X-Xnear/range	Range			Plain d11	Cells/ml	abs(X-Xnear)	X-Xnear/range	Range			Plain d14	Cells/ml	abs(X-Xnear)	X-Xnear/range	Range
1	173000	3000	0.00145829	2057200			1	198000	537000	0.362348	1482000	outlier		1	621000	5000	0.00475285	1233600
2	2110000	1934000	0.940113		outlier		2	1680000	728000	0.491228		outlier		2	1310000	689000	0.654943		outlier
3	143000	30000	0.0145829				3	875000	77000	0.0519568				3	616000	5000	0.00475285
4	52800	34600	0.016819				4	952000	77000	0.0519568				4	76400	250600	0.238213
5	176000	3000	0.00145829				5	795000	60000	0.0404858				5	327000	225000	0.213878
6	87400	34600	0.016819				6	735000	60000	0.0404858				6	552000	64000	0.0608365

## Sheet: Stats
	d1 plain	d11 plain	d14 plain	d1 RGD	d11 RGD	d14 RGD
d1 plain		x				x
d11 plain
d14 plain						x
d1 RGD						x
d11 RGD						0.0742
d14 RGD
